# Supplementary material for: ZIF-8 micromembranes for gas separation prepared on laser-perforated brass supports
Source: Royal Society of Chemistry journal article supplement (doi:10.1039/c4ta00547c), 2014-01-01
Supplement: c4ta00547c1.pdf [file c4ta00547c1.pdf]

ARTICLE

Supporting Information

**ZIF-8 micromembranes for gas separation prepared on laser-perforated brass supports**

Marta Navarro,<sup>a,b</sup> Beatriz Seoane,<sup>a</sup> Ester Mateo,<sup>c</sup> Ruth Lahoz,<sup>d</sup> Germán F. de la Fuente,<sup>d</sup> and Joaquín Coronas<sup>a,\*</sup>

<sup>a</sup>Chemical and Environmental Engineering Department and Nanoscience Institute of Aragón (INA), Universidad de Zaragoza, 50018 Zaragoza, Spain

<sup>b</sup>Department of Earth Sciences, Universidad de Zaragoza, 50009 Zaragoza, Spain

<sup>c</sup>Departamento de Didáctica de las Ciencias Experimentales, Universidad de Zaragoza, 50009 Zaragoza, Spain

<sup>d</sup>Instituto de Ciencia de Materiales de Aragón, CSIC-Universidad de Zaragoza, 50018 Zaragoza, Spain

\*Corresponding author: [coronas@unizar.es](mailto:coronas@unizar.es). Tel: +34 976 762471. Fax: +34 976 761879.

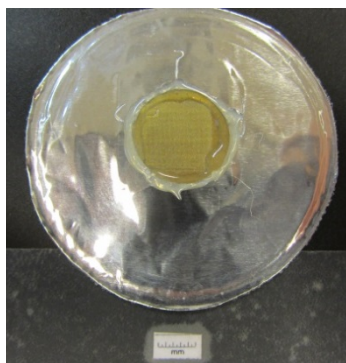

**Figure S1.** Micromembrane adapted to the permeation modulus; total diameter: 4.4 cm.

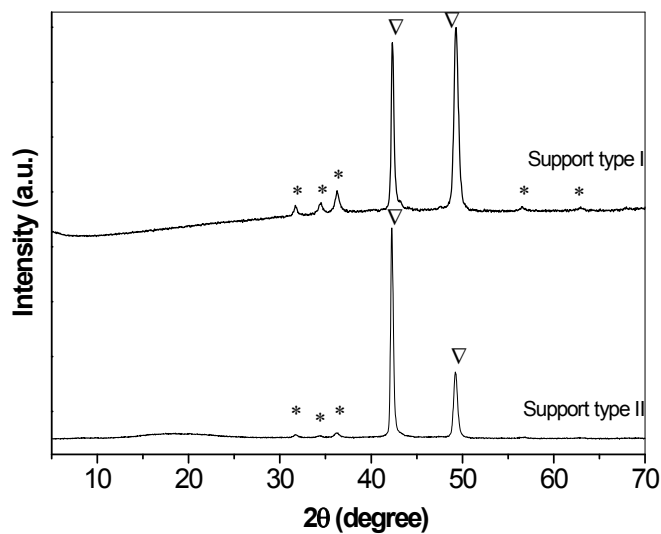

**Figure S2.** XRD patterns of irradiated supports. Asterisks correspond to ZnO while triangles to brass.

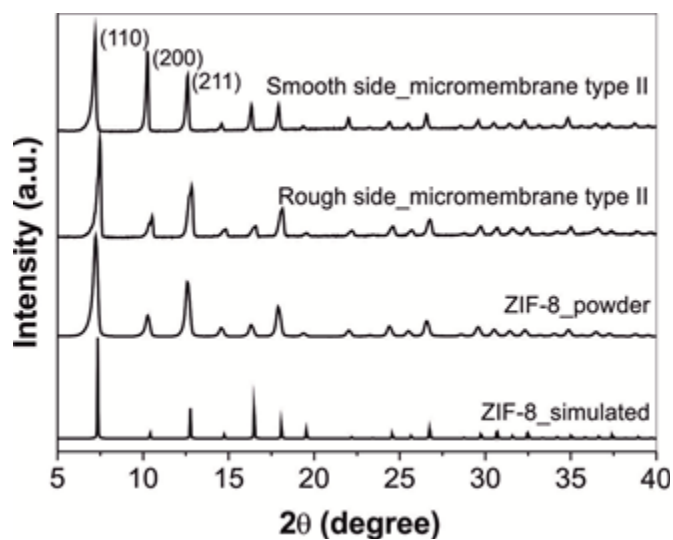

**Figure S3.** XRD patterns of ZIF-8 micromembrane grown on smooth (outlet) and rough (inlet) side of laser perforated brass sheet as compared to the powder and simulated diffractograms.

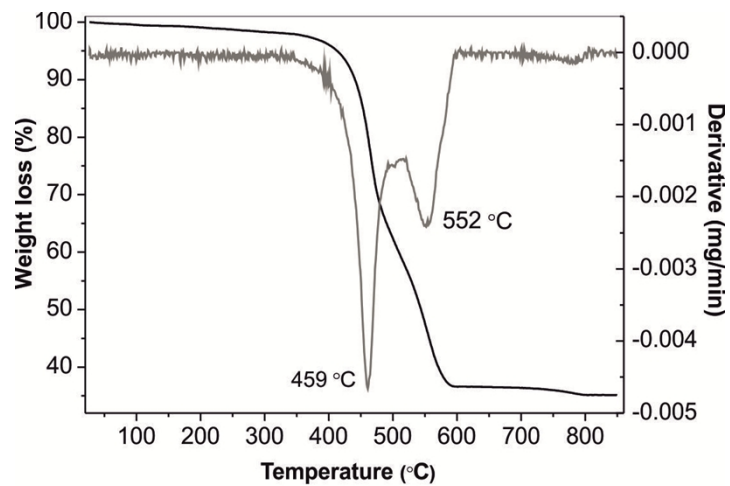

**Figure S4.** Weight loss curve in N<sub>2</sub> and the corresponding derivative for ZIF-8 powder collected after the micromembrane synthesis.
